# Supplementary material for: AST-487 Inhibits RET Kinase Driven TERT Expression in Bladder Cancer
Source: MDPI journal article supplement (doi:10.3390/ijms231810819), 2022-09-16
Supplement: s1 [file s1]

**Table S1. Primer sequences**

| Gene name      | Direction | Sequence                 | Assay   |
|----------------|-----------|--------------------------|---------|
| hTERT          | Forward   | CATTTTCATCAGCAAGTTTGGAAG | qRT-PCR |
|                | Reverse   | TTTCAGGATGGAGTAGCAGAGG   |         |
| GFP-hTERT      | Forward   | CAACGAGAAGCGCGATCA       | qRT-PCR |
|                | Reverse   | GCGGCATCTTGTACAGCTC      |         |
| CDKL3          | Forward   | CGTTTCCATGGTGGCAAGTG     | qRT-PCR |
|                | Reverse   | GGGCTTTTACTACGGCGTCA     |         |
| HIPK4          | Forward   | CAGGTCTCGCCTGAGGATGA     | qRT-PCR |
|                | Reverse   | GGGTCTGGCCTCTCAGCTT      |         |
| MAP3K7         | Forward   | TGGTGCTGAACCATTGCCA      | qRT-PCR |
|                | Reverse   | TGCAACCAGCAGTAAGTTTGG    |         |
| RET            | Forward   | TCTCAGAGGAGGAGACACCG     | qRT-PCR |
|                | Reverse   | CGGGTCTGACATGCCATAGA     |         |
| $\beta$ -Actin | Forward   | CACTCTTCCAGCCTTCCTTC     | qRT-PCR |
|                | Reverse   | GTACAGGTCTTTGCGGATGT     |         |
