# Supplementary material for: AST-487 Inhibits RET Kinase Driven TERT Expression in Bladder Cancer
Source: MDPI journal article supplement (doi:10.3390/ijms231810819), 2022-09-16
Supplement: s1 [file s1]

## SUPPLEMENTAL INFORMATION

**Figure S1. AST-487 suppresses the promoter driven expression of GFP-hTERT.** Representative images of UMG12 and UWG6 cells showing changes in intensity of GFP-hTERT after treatment with AST-487 at indicated concentrations for 72h. DMSO was used as control, scale bar is 150 $\mu$ M.

**Figure S2.** Pan-cancer expression of hTERT in normal and tumor tissues taken from TCGA database.

**Figure S3.** Analysis of co-occurrence of RET and TERT alterations using cBioPortal web site (<https://www.cbioportal.org/>) and tumor data from reference [10].

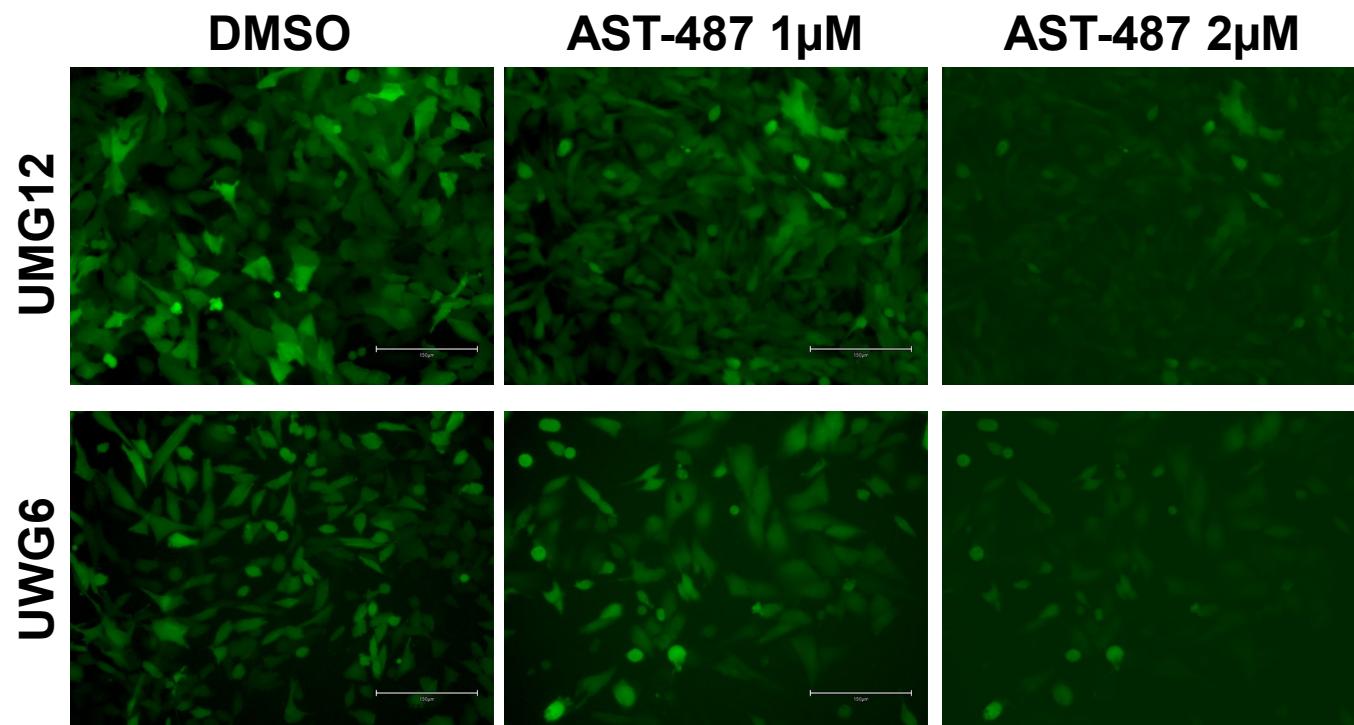

**Figure S1**

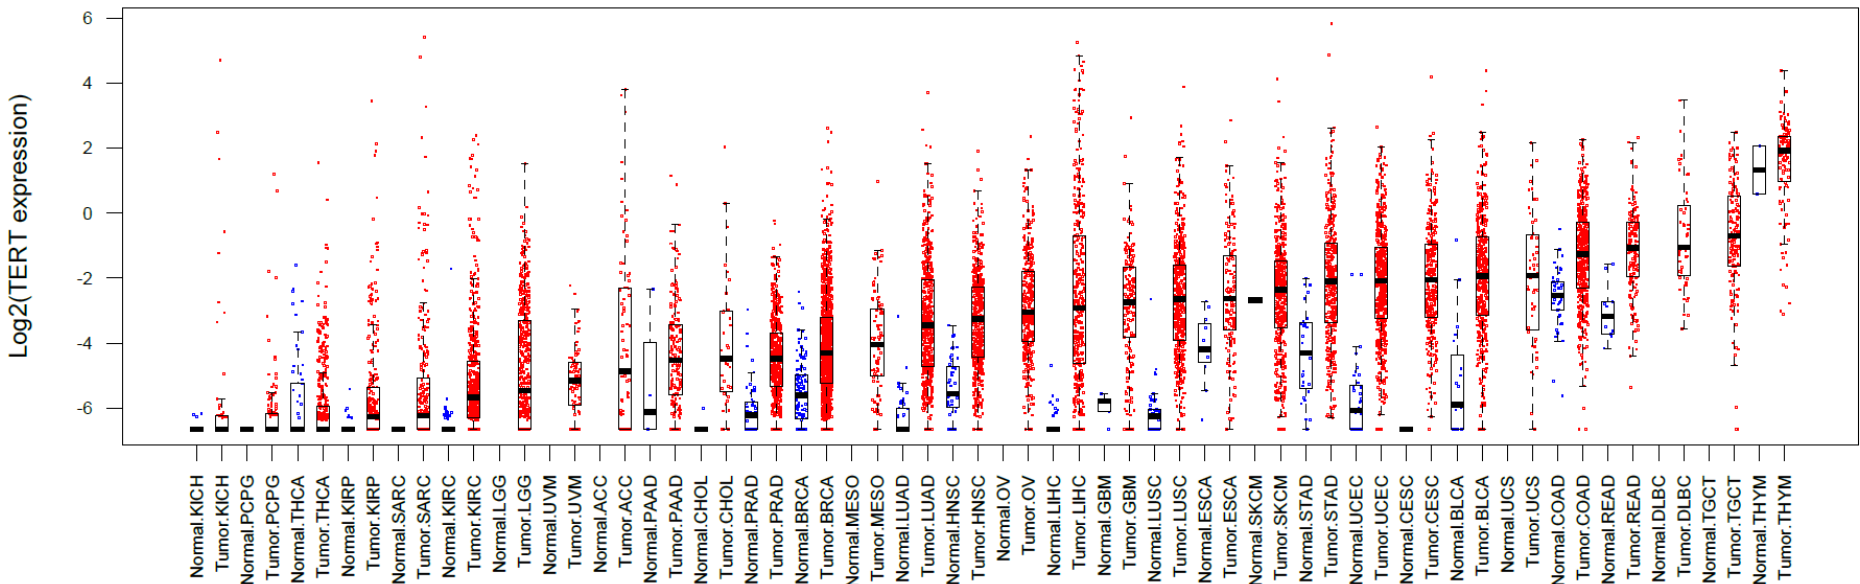

Figure S2

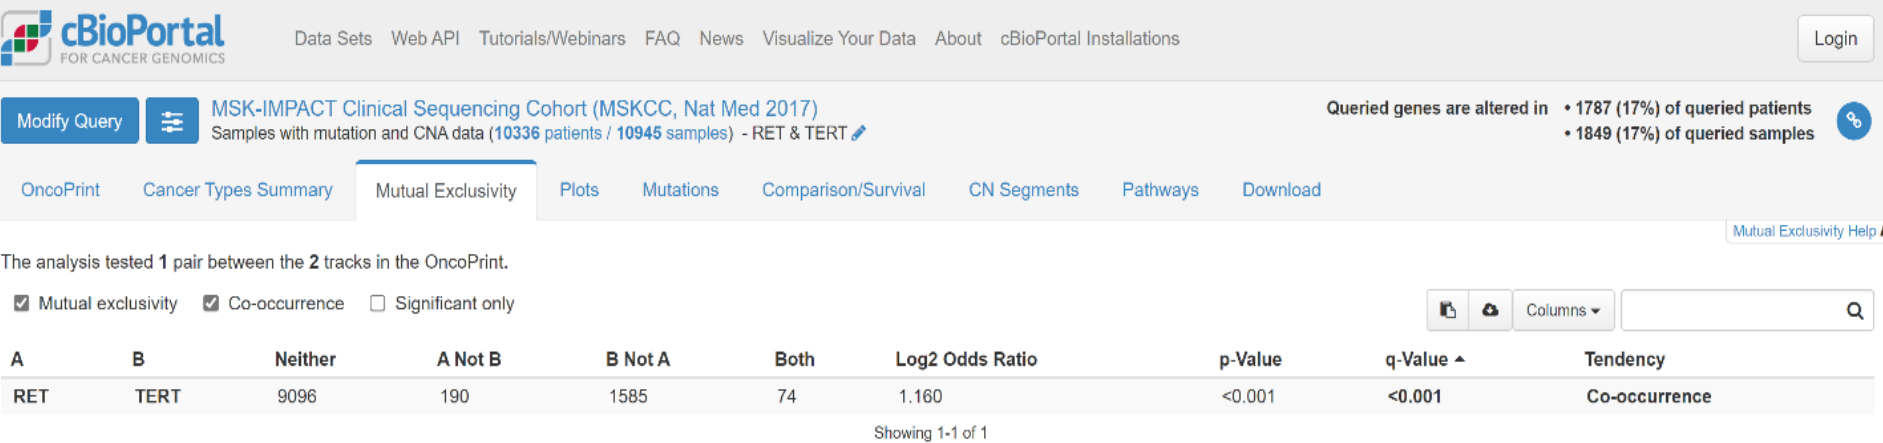

Figure S3
