# Supplementary material for: AST-487 Inhibits RET Kinase Driven TERT Expression in Bladder Cancer
Source: MDPI journal article supplement (doi:10.3390/ijms231810819), 2022-09-16
Supplement: s1 [file s1]

Table S2. List of kinase targets of potential hits identified from HCS.

| Number of Kinase inhibitor hits |                                               |           |           |                                       |
|---------------------------------|-----------------------------------------------|-----------|-----------|---------------------------------------|
|                                 | Known to regulate<br>hTERT from<br>Literature | 3D screen | 2D screen | Hits overlapped in<br>3D & 2D screens |
| PI3K                            | Yes                                           | 38        | 12        | 11                                    |
| CDK                             | No                                            | 27        | 3         | 2                                     |
| EGFR                            | Yes                                           | 26        | 16        | 11                                    |
| mTOR                            | Yes                                           | 28        | 15        | 13                                    |
| Akt                             | Yes                                           | 16        | 7         | 7                                     |
| Raf                             | Yes                                           | 12        | 5         | 4                                     |
| c-Met                           | No                                            | 10        | 9         | 4                                     |
| JAK                             | No                                            | 11        | 3         | 1                                     |
| MEK                             | Yes                                           | 10        | 10        | 3                                     |
| VEGFR                           | No                                            | 10        | 4         | 3                                     |
| ALK                             | No                                            | 8         | 2         | 1                                     |
| ATM/ATR                         | No                                            | 7         | 2         | 1                                     |
| Bcr-Abl                         | Yes                                           | 6         | 4         | 2                                     |
| DNA-PK                          | No                                            | 6         | 0         | 0                                     |
| p38 MAPK                        | Yes                                           | 6         | 16        | 5                                     |
| FGFR                            | No                                            | 5         | 2         | 1                                     |
| ERK                             | Yes                                           | 4         | 4         | 1                                     |
| FLT3, JAK, PKC                  | No                                            | 4         | 3         | 1                                     |
| c-RET, VEGFR                    | No                                            | 3         | 1         | 1                                     |
| PDGFR, c-Kit,<br>VEGFR          | No                                            | 3         | 2         | 1                                     |
| CSF-1R, Raf                     | No                                            | 2         | 1         | 1                                     |
| HER2                            | No                                            | 2         | 1         | 1                                     |
| IRAK                            | No                                            | 2         | 1         | 1                                     |
| PDK-1                           | No                                            | 2         | 1         | 1                                     |
| HIPK4                           | No                                            | 1         | 1         | 1                                     |
